# Supplementary material for: Model-Based Meta-Analysis Supporting the Combination of Acetaminophen and Topical Diclofenac in Acute Pain: A Therapy for Mild-to-Moderate Osteoarthritis Pain?
Source: Springer Nature journal article supplement (doi:10.1007/s40122-023-00569-z), 2024-01-06
Supplement: MOESM1 [file 26603172]

# **Model-based meta-analysis supporting the combination of acetaminophen and topical diclofenac in acute pain: A therapy for mild-to-moderate osteoarthritis pain?**

Authors: Vidhu Sethi<sup>1</sup>, Li Qin<sup>2</sup>, Eugène Cox<sup>2</sup>, Iñaki F. Trocóniz<sup>3</sup>, Oscar Della Pasqua<sup>4,5</sup>

Affiliations:

1. Medical Affairs, Haleon (formerly GSK Consumer Healthcare), Singapore
2. Quantitative Science, Certara, Princeton, USA
3. Department of Pharmaceutical Technology and Chemistry, School of Pharmacy and Nutrition, University of Navarra, Pamplona, Spain
4. Clinical Pharmacology Modelling and Simulation, GlaxoSmithKline, Brentford, UK
5. Clinical Pharmacology & Therapeutics Group, University College London, London, UK

Corresponding author:

Oscar Della Pasqua

E-mail: [o.dellapasqua@ucl.ac.uk](mailto:o.dellapasqua@ucl.ac.uk)

## Supplementary Material

Supplementary Table S1. Search strategy for studies on the combination of oral acetaminophen and oral or topical diclofenac in acute pain

| Area/objective  |                                           | No. | Key words                                                                                                                                                                                                                                                                                                                                                                                                                                                                                                   | Results<br>MEDLINE via<br>PubMed |
|-----------------|-------------------------------------------|-----|-------------------------------------------------------------------------------------------------------------------------------------------------------------------------------------------------------------------------------------------------------------------------------------------------------------------------------------------------------------------------------------------------------------------------------------------------------------------------------------------------------------|----------------------------------|
| I. Intervention | <b>Ia. Diclofenac</b>                     | 1   | ("Diclofenac"[Mesh]) OR (diclofenac [tiab] OR Diclophenac [tiab] OR Dicrofenac [tiab] OR Dichlofenal [tiab] OR "Diclofenac Sodium" [tiab] OR "Sodium Diclofenac" [tiab] OR Diclofenac, Sodium [tiab] OR "Diclonate P" [tiab] OR Feloran [tiab] OR Voltarol [tiab] OR Novapirina [tiab] OR Orthofen [tiab] OR Ortofen [tiab] OR Orthophen [tiab] OR SR-38 [tiab] OR "SR 38" [tiab] OR SR38 [tiab] OR Voltaren [tiab] OR "GP-45,840" [tiab])                                                                  | 13,438                           |
|                 | <b>Topical administration</b>             | 2   | "Administration, Topical"[Mesh] OR topical* [tiab] OR cutaneous [tiab] OR dermal [tiab] OR transcutaneous [tiab] OR transdermal [tiab] OR percutaneous [tiab] OR skin [tiab] OR massage [tiab] OR embrocation [tiab] OR gel [tiab] OR ointment [tiab] OR aerosol [tiab] OR cream [tiab] OR creme [tiab] OR lotion [tiab] OR mousse [tiab] OR foam [tiab] OR liniment [tiab] OR spray [tiab] OR rub [tiab] OR balm [tiab] OR salve [tiab] OR emulsion [tiab] OR oil [tiab] OR patch [tiab] OR plaster [tiab] | 1,525,339                        |
|                 | <b>Oral administration (systemic use)</b> | 3   | "systemic use" [tiab] OR "systemic treatment" [tiab] OR "systemic therapy" [tiab] OR "systemic administration" OR "systemic" [tiab] OR "Administration, Oral"[Mesh] OR "oral administration"[tiab] OR "Oral Drug Administration"[tiab] OR "oral use"[tiab] OR "oral therapy"[tiab] OR "oral treatment"[tiab] OR oral* [tiab] OR "Tablets"[Mesh] OR tablet*[tiab] OR "Capsules"[Mesh] OR "capsule*" [tiab] OR caplet* [tiab]                                                                                 | 1,283,569                        |
|                 | <b>Ib. Acetaminophen</b>                  | 4   | N-Acetyl-p-aminophenol [tiab] OR Acetamidophenol [tiab] OR N-(4-Hydroxyphenyl)acetanilide [tiab] OR "Acetaminophen"[Mesh] OR Hydroxyacetanilide [tiab] OR APAP [tiab] OR Acetaminophen [tiab] OR p-Acetamidophenol [tiab] OR p-Hydroxyacetanilide [tiab] OR Acephen [tiab] OR Acetaco [tiab] OR Tylenol [tiab] OR Anacin-3 [tiab] OR "Anacin 3" [tiab] OR Anacin3 [tiab] OR Datriil [tiab] OR Acamol [tiab] OR Algotropyl [tiab] OR paracetamol [tiab] OR Panadol [tiab]                                    | 29,414                           |
|                 |                                           | 5   | #2 OR #3                                                                                                                                                                                                                                                                                                                                                                                                                                                                                                    | 2,666,226                        |
|                 |                                           | 6   | #1 AND #5                                                                                                                                                                                                                                                                                                                                                                                                                                                                                                   | 4,372                            |
|                 |                                           | 7   | #6 AND #4                                                                                                                                                                                                                                                                                                                                                                                                                                                                                                   | 317                              |

| Area/objective            | No.       | Key words                                                                                                                                                                                                                                                                                                                                                                                                                                   | Results<br>MEDLINE via<br>PubMed |
|---------------------------|-----------|---------------------------------------------------------------------------------------------------------------------------------------------------------------------------------------------------------------------------------------------------------------------------------------------------------------------------------------------------------------------------------------------------------------------------------------------|----------------------------------|
| <b>II. Disease (pain)</b> | <b>8</b>  | (("Pain"[Mesh] OR pain [tiab] OR Pains [tiab] OR "Physical Suffering" [tiab] OR "Physical Sufferings" [tiab] OR ache [tiab] OR aches [tiab] OR "joint pain" [tiab] OR "painful knee" [tiab] OR "painful joint" [tiab]) OR (Toothaches [tiab] or Odontalgia [tiab] or Odontalgia* [tiab] OR "Toothache"[Mesh] OR "dental pain" [tiab] OR "painful bunion" [tiab])) OR ((bunione* [tiab] OR dental [tiab]) AND ("Pain"[Mesh] OR pain [tiab])) | 807,686                          |
| <b>III. Final results</b> | <b>9</b>  | #7 AND #8                                                                                                                                                                                                                                                                                                                                                                                                                                   | 199                              |
|                           | <b>10</b> | #9 NOT ("Animals"[Mesh] NOT ("Animals"[Mesh] AND "Humans"[Mesh]))                                                                                                                                                                                                                                                                                                                                                                           | 188                              |
|                           | <b>11</b> | #10 AND Filters: English                                                                                                                                                                                                                                                                                                                                                                                                                    | 182                              |

Supplementary Table S2. Inclusion criteria for studies on the combination of oral acetaminophen and oral or topical diclofenac in acute pain

| PICOS framework     | Inclusion criteria                                                                                                                                                                                                       |
|---------------------|--------------------------------------------------------------------------------------------------------------------------------------------------------------------------------------------------------------------------|
| <b>Population</b>   | Patients (no age restrictions) suffering with pain                                                                                                                                                                       |
| <b>Intervention</b> | Combination of oral paracetamol and topical/systemic diclofenac                                                                                                                                                          |
| <b>Comparator</b>   | NA                                                                                                                                                                                                                       |
| <b>Outcomes</b>     | Pharmacokinetic (PK) parameters (AUC, Cl, volume of distributions), Endpoints focused on the measurement of pain reduction expressed both as a rating scale or number of patients with none, mild, moderate, severe pain |
| <b>Study types</b>  | Any                                                                                                                                                                                                                      |
| <b>Other</b>        | English                                                                                                                                                                                                                  |

Note that no specific exclusion criteria were defined for this combination search

Supplementary Table S3. Reported pain score reduction in studies on the combination of oral acetaminophen and oral or topical diclofenac in acute pain

| Study              | Arm | Drug 1  | Drug 2 | Endpoint   | Endpoint                       | Baseline | Value | Change |
|--------------------|-----|---------|--------|------------|--------------------------------|----------|-------|--------|
| Elzaki WM 2016     | 1   | Ace     |        | Pain score | NRS                            | 8        | 2.25  | -5.75  |
| Elzaki WM 2016     | 2   | Ace     | Dic    | Pain score | NRS                            | 8        | 0.5   | -7.5   |
| Elzaki WM 2016     | 3   | Placebo |        | Pain score | NRS                            | 8        | 2.82  | -5.18  |
| Munishankar B 2008 | 1   | Ace     |        | Pain score | VAS at rest                    | NA       | 2     | -6     |
| Munishankar B 2008 | 2   | Dic     |        | Pain score | VAS at rest                    | NA       | 2     | -6     |
| Munishankar B 2008 | 3   | Ace     | Dic    | Pain score | VAS at rest                    | NA       | 1.5   | -6.5   |
| Riad W 2007        | 1   | Dic     |        | Pain score | Pain rating scale (0-5) change | 2.6      | 0.8   | -1.8   |
| Riad W 2007        | 2   | Ace     |        | Pain score | Pain rating scale (0-5) change | 3.1      | 0.5   | -2.6   |
| Riad W 2007        | 3   | Ace     | Dic    | Pain score | Pain rating scale (0-5) change | 2.9      | 0.8   | -2.1   |
| Woo WW 2005        | 1   | Dic     |        | Pain score | VAS at rest                    | 2.4      | 0.8   | -1.6   |
| Woo WW 2005        | 2   | Ace     |        | Pain score | VAS at rest                    | 2        | 0.8   | -1.2   |
| Woo WW 2005        | 3   | Ace     | Dic    | Pain score | VAS at rest                    | 2.5      | 0.8   | -1.7   |
| Beck DH 2000       | 1   | Ace     |        | Pain score | VAS                            | NA       | 0.9   | -1.6   |
| Beck DH 2000       | 2   | Ace     |        | Pain score | VAS                            | NA       | 0.4   | -2.1   |
| Beck DH 2000       | 3   | Ace     | Dic    | Pain score | VAS                            | NA       | 0.4   | -2.1   |
| Breivik EK 1999    | 1   | Dic     |        | Pain score | VAS                            | 58       | 38    | -20    |
| Breivik EK 1999    | 2   | Ace     |        | Pain score | VAS                            | 60       | 37    | -23    |
| Breivik EK 1999    | 3   | Ace     | Dic    | Pain score | VAS                            | 57       | 19    | -38    |
| Hannam JA 2014     | 1   | Ace     |        | Pain score | VAS                            | NA       | NA    | NA     |
| Hannam JA 2014     | 2   | Dic     |        | Pain score | VAS                            | NA       | NA    | NA     |
| Hannam JA 2014     | 3   | Ace     | Dic    | Pain score | VAS                            | NA       | NA    | NA     |
| Montgomery JE 1996 | 1   | Ace     |        | Pain score | VAS                            | NA       | 3.4   | -4.6   |
| Montgomery JE 1996 | 2   | Dic     |        | Pain score | VAS                            | NA       | 1.9   | -6.1   |
| Montgomery JE 1996 | 3   | Ace     | Dic    | Pain score | VAS                            | NA       | 2.1   | -5.9   |
| Siddik SM 2001     | 1   | Ace     |        | Pain score | VAS at rest                    | NA       | 3.5   | NA     |
| Siddik SM 2001     | 2   | Dic     |        | Pain score | VAS at rest                    | NA       | 2.3   | NA     |

| Study                   | Arm | Drug 1  | Drug 2 | Endpoint   | Endpoint    | Baseline | Value | Change |
|-------------------------|-----|---------|--------|------------|-------------|----------|-------|--------|
| <b>Siddik SM 2001</b>   | 3   | Ace     | Dic    | Pain score | VAS at rest | NA       | 1.5   | NA     |
| <b>Siddik SM 2001</b>   | 4   | Placebo |        | Pain score | VAS at rest | NA       | 3.2   | NA     |
| <b>Hiller A 2004</b>    | 1   | Ace     |        | Pain score | VAS (0-3)   | 2.25     | 1.4   | -0.85  |
| <b>Hiller A 2004</b>    | 2   | Dic     |        | Pain score | VAS (0-3)   | 1.5      | 1.65  | 0.15   |
| <b>Hiller A 2004</b>    | 3   | Ace     | Dic    | Pain score | VAS (0-3)   | 2        | 1.2   | -0.8   |
| <b>Matthews RW 1984</b> | 1   | Ace     |        | Pain score | VAS         | NA       | NA    | NA     |
| <b>Matthews RW 1984</b> | 2   | Ace     |        | Pain score | VAS         | NA       | NA    | NA     |
| <b>Matthews RW 1984</b> | 3   | Ace     | Dic    | Pain score | VAS         | NA       | NA    | NA     |

Ace: acetaminophen, Dic: diclofenac, NRS: numerical rating scale, VAS: visual analog scale, NA: no value reported

Supplementary Table S4. Summary of model development steps for the evaluation of opioid sparing effect in acute pain

| Model development steps         | Model number | Reference model | p-value versus reference model | AIC | logLik |
|---------------------------------|--------------|-----------------|--------------------------------|-----|--------|
| <b>base mod</b>                 | 2            |                 | -                              | 115 | -51    |
| <b>mod2 + interaction term*</b> | 2.1          | 2               | 0.028                          | 113 | -48    |

\*final model

Supplementary Table S5. Typical treatment effect on mean opioid PCA consumption difference from placebo, and percent difference from acetaminophen.

| Treatment                                  | Model predicted mean opioid PCA difference from placebo (mg) with 95% CI | Percent difference from acetaminophen (%) |
|--------------------------------------------|--------------------------------------------------------------------------|-------------------------------------------|
| <b>Systemic acetaminophen</b>              | -18.93 ( -29.47, -8.33)                                                  | -                                         |
| <b>Systemic acetaminophen + diclofenac</b> | -33.87 ( -44.43, -22.26)                                                 | -32.62 ( -47.59, -19.1)                   |
| <b>Systemic diclofenac</b>                 | -28.41 ( -39.15, -17.68)                                                 | -20.7 ( -32.86, -8.45)                    |

Values are mean parameter estimates based on maximum likelihood model predictions, with 95% confidence interval of resampled parameter estimates from the final model variance-covariance matrix 1,000 times. CI: confidence interval; PCA: patient-controlled analgesia



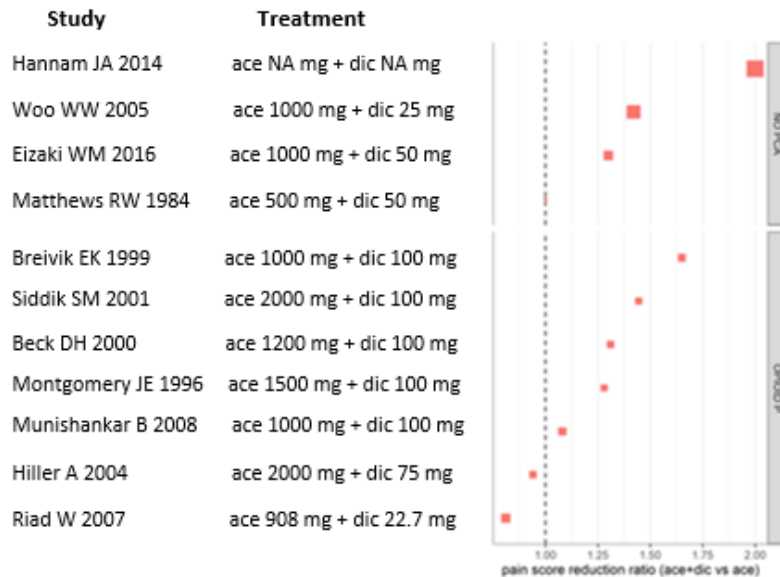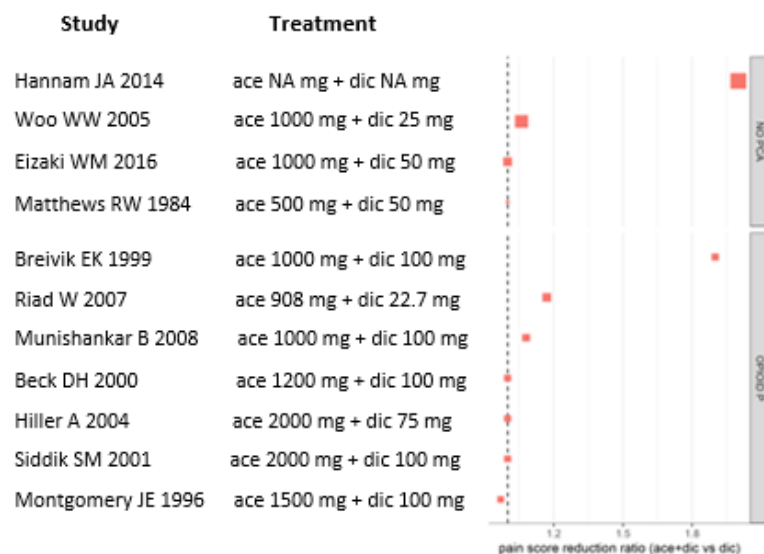

Supplementary Figure S1. The observed ratio of the beneficial effect of systemic ace+dic on pain score reduction at 6 to 72 hours, compared to either drug alone across 11 acute pain studies by use of opioid patient-controlled analgesia (PCA) vs. no PCA. The vertical dashed line (ratio=1) indicates no beneficial effect of combination compared to either drug alone in the same study. The size of the squares represents the sample size in the study arm. ace: acetaminophen; dic: diclofenac; OPIOID P: Opioid PCA; NA: not applicable

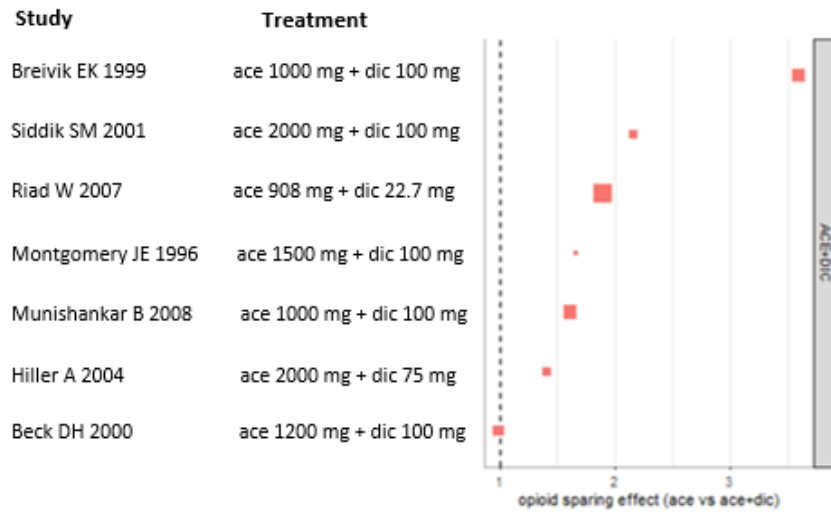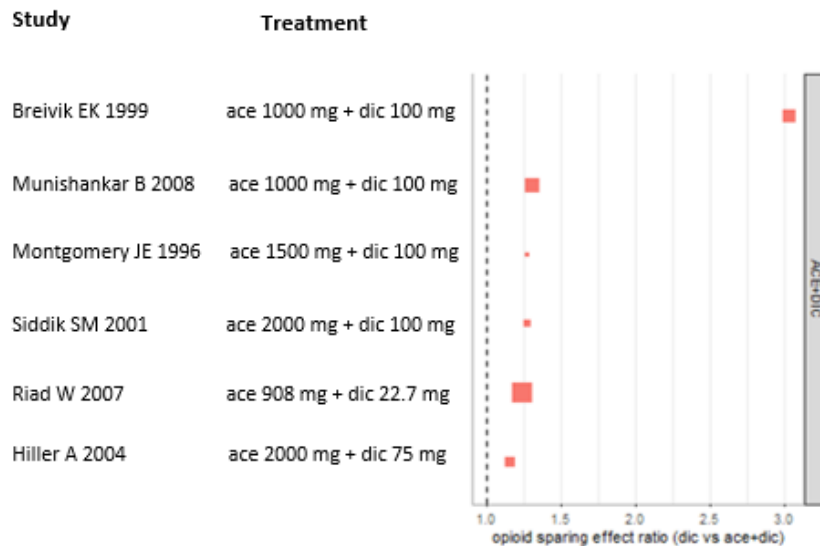

Supplementary Figure S2. The observed ratio of the beneficial effect of systemic ace+dic on opioid sparing effect at 6 to 72 hours, in comparison to either drug alone in seven acute pain studies allowing opioid patient-controlled analgesia. The vertical dashed line (ratio=1) indicates no beneficial effect of combination compared to either drug alone within study. PCA: patient-controlled analgesia. The size of symbol represents the sample size in the study arm. ace: acetaminophen; dic: diclofenac

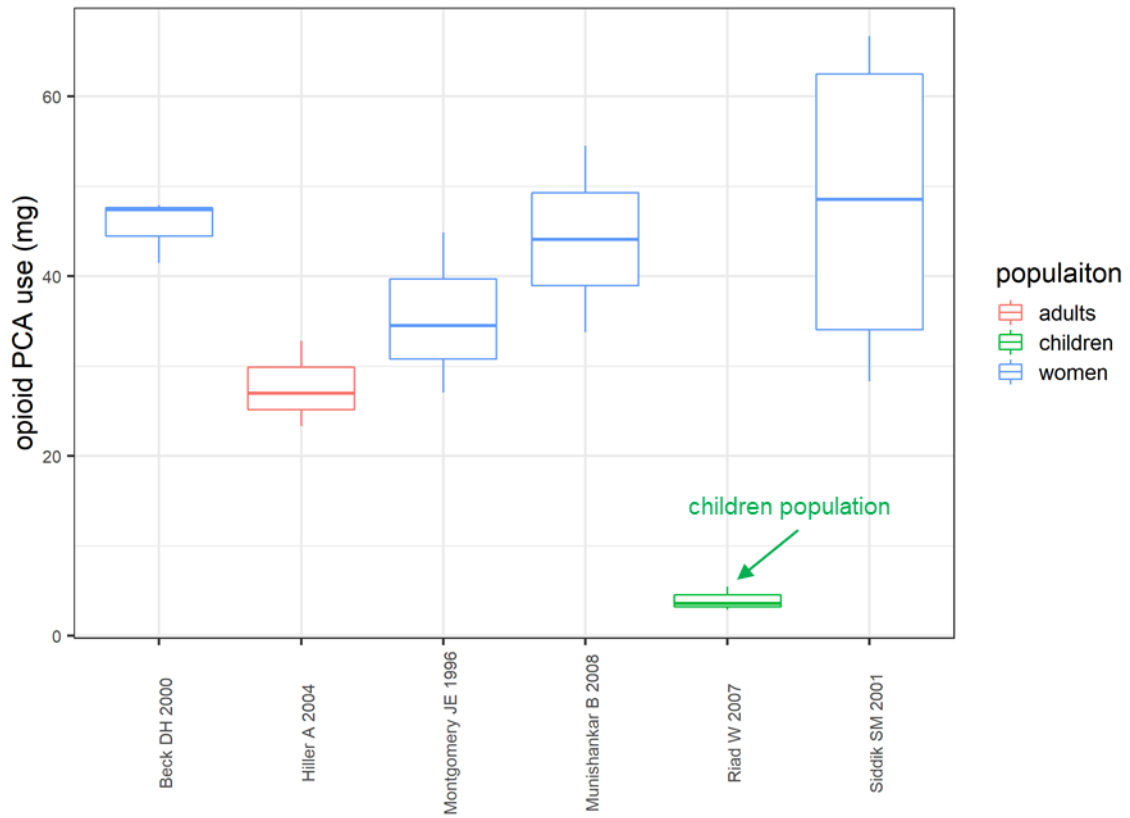

Supplementary Figure S3. Reported mean opioid use (mg) across the six studies in an acute pain setting. Study “Riad 2007” study was conducted in children and the remaining 5 studies were conducted in adult population. PCA: patient-controlled analgesia

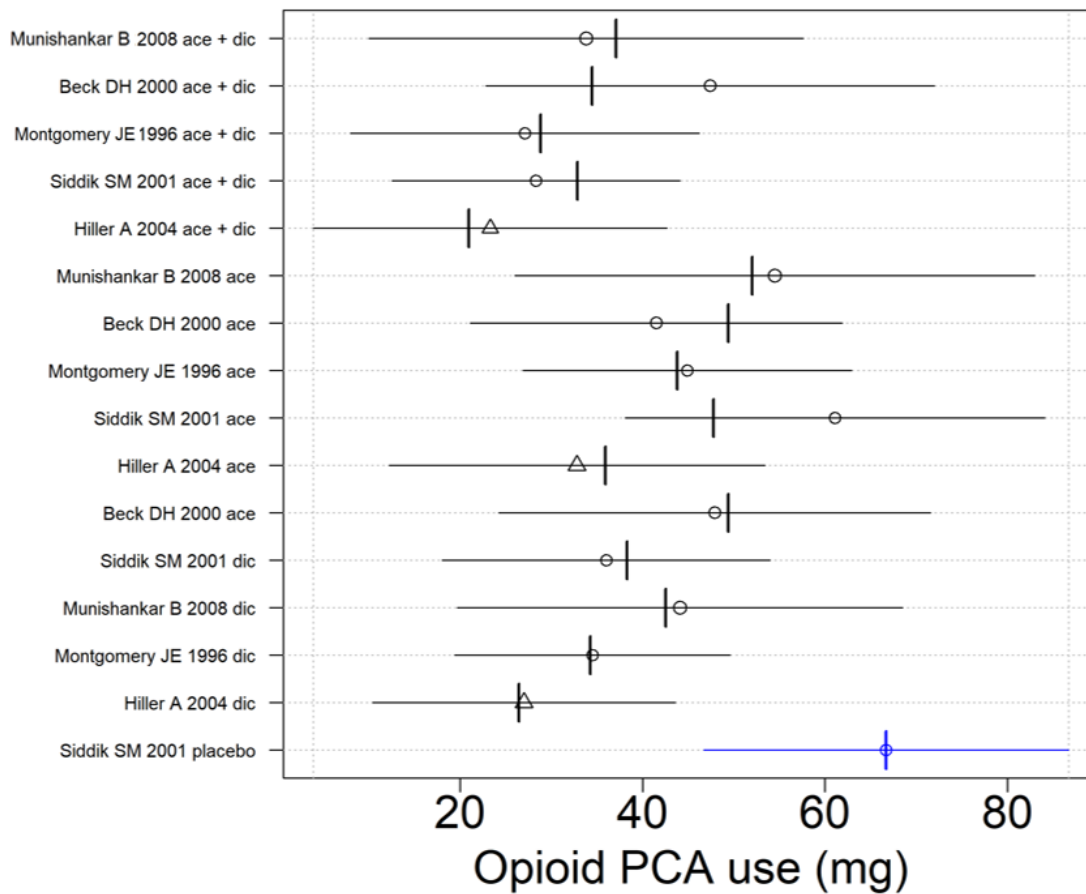

Supplementary Figure S4. Observed (circle) and model-predicted (vertical bar) use of opioid PCA (mg) for included treatment arms. The symbols represent the mean reported response rate in the various trials and treatment arms. Circle size is proportional to sample size of each arm. The horizontal lines represent the 95% confidence intervals. The vertical tics depict model predictions. Blue is placebo, and black is active treatment arm; circles describe gynecological surgery, and triangle represents tonsillectomy. PCA: patient-controlled analgesia, ace: acetaminophen, dic: diclofenac
